# Supplementary material for: Antimicrobial resistance genotypes and phenotypes of Campylobacter jejuni isolated in Italy from humans, birds from wild and urban habitats, and poultry
Source: PubMed Central journal article supplement (PMC6788699; doi:10.1371/journal.pone.0223804), 2019-10-11
Supplement: pone.0223804.s001.pdf [file pone.0223804.s001.pdf]

| Assembly ID         | Source          | TAG     | GyrA_AA_86 | OXA-184 | OXA-61 | cmeA  | cmeB  | cmeC  | cmeR | tetO |
|---------------------|-----------------|---------|------------|---------|--------|-------|-------|-------|------|------|
| 2015-TE-10529.fasta | Chicken food    | Chicken | I          | 100     | .      | 100   | 99.9  | 100   | 100  | 100  |
| 2015-TE-10534.fasta | Chicken animals | Chicken | I          | 100     | .      | 100   | 99.9  | 100   | 100  | 100  |
| 2015-TE-10538.fasta | Chicken food    | Chicken | I          | 100     | .      | 100   | 99.9  | 100   | 100  | 100  |
| 2015-TE-10544.fasta | Chicken food    | Chicken | I          | .       | .      | 100   | 99.9  | 100   | 100  | 99.9 |
| 2015-TE-10545.fasta | Chicken animals | Chicken | I          | .       | .      | 100   | 99.9  | 100   | 100  | 99.9 |
| 2015-TE-10553.fasta | Chicken food    | Chicken | I          | .       | .      | 100   | 99.9  | 100   | 100  | 99.9 |
| 2015-TE-11797.fasta | Chicken animals | Chicken | I          | .       | 100    | 100   | 99.9  | 100   | 100  | 100  |
| 2015-TE-11801.fasta | Chicken animals | Chicken | I          | 100     | .      | 100   | 99.9  | 100   | 100  | .    |
| 2015-TE-11813.fasta | Chicken animals | Chicken | I          | .       | 100    | 100   | 100   | 100   | 100  | 99.9 |
| 2015-TE-11820.fasta | Chicken animals | Chicken | I          | .       | 100    | 100   | 100   | 100   | 100  | 99.9 |
| 2015-TE-11821.fasta | Chicken animals | Chicken | I          | 100     | .      | 100   | 99.9  | 100   | 100  | 100  |
| 2015-TE-11831.fasta | Chicken animals | Chicken | I          | .       | 100    | 100   | 100   | 100   | 100  | 100  |
| 2015-TE-11833.fasta | Chicken animals | Chicken | I          | .       | 100    | 100   | 99.9  | 100   | 100  | 100  |
| 2015-TE-11834.fasta | Chicken animals | Chicken | I          | .       | 100    | 100   | 99.9  | 100   | 100  | 100  |
| 2015-TE-11835.fasta | Chicken animals | Chicken | I          | .       | 100    | 100   | 99.9  | 100   | 100  | 100  |
| 2015-TE-11836.fasta | Chicken food    | Chicken | I          | .       | 100    | 100   | 99.9  | 100   | 100  | 100  |
| 2015-TE-12208.fasta | Chicken animals | Chicken | T          | .       | 100    | 100   | 100   | 100   | 100  | .    |
| 2015-TE-12214.fasta | Chicken animals | Chicken | T          | .       | 100    | 100   | 100   | 100   | 100  | .    |
| 2015-TE-12215.fasta | Chicken food    | Chicken | T          | .       | 100    | 100   | 100   | 100   | 100  | .    |
| 2015-TE-12221.fasta | Chicken food    | Chicken | T          | .       | 100    | 100   | 100   | 100   | 100  | .    |
| 2015-TE-12222.fasta | Chicken food    | Chicken | T          | .       | 100    | 100   | 100   | 100   | 100  | .    |
| 2015-TE-12229.fasta | Chicken animals | Chicken | T          | .       | 100    | 100   | 100   | 100   | 100  | .    |
| 2015-TE-12232.fasta | Chicken food    | Chicken | T          | .       | 100    | 100   | 100   | 100   | 100  | .    |
| 2015-TE-12237.fasta | Chicken food    | Chicken | I          | .       | .      | 99.91 | 99.55 | 99.93 | 100  | .    |
| 2015-TE-12793.fasta | Chicken animals | Chicken | I          | 100     | .      | 100   | 99.9  | 100   | 100  | 100  |
| 2015-TE-12794.fasta | Chicken animals | Chicken | I          | 100     | .      | 99.91 | 99.55 | 100   | 100  | 100  |
| 2015-TE-13054.fasta | Chicken animals | Chicken | I          | 100     | .      | 100   | 99.9  | 100   | 100  | 100  |
| 2015-TE-13056.fasta | Chicken animals | Chicken | I          | 100     | .      | 100   | 99.9  | 100   | 100  | 100  |
| 2015-TE-13057.fasta | Chicken animals | Chicken | I          | 100     | .      | 100   | 99.9  | 100   | 100  | 100  |
| 2015-TE-13525.fasta | Chicken food    | Chicken | T          | .       | 100    | 100   | 99.55 | 100   | 100  | 100  |
| 2015-TE-13529.fasta | Chicken animals | Chicken | I          | .       | 100    | 100   | 100   | 100   | 100  | 99.9 |

|                         |                 |            |   |       |     |     |      |       |       |       |
|-------------------------|-----------------|------------|---|-------|-----|-----|------|-------|-------|-------|
| 2015-TE-13534.fasta     | Chicken food    | Chicken    | I | .     | 100 | 100 | 100  | 100   | 100   | 99.9  |
| 2015-TE-13538.fasta     | Chicken food    | Chicken    | T | .     | 100 | 100 | 99.9 | 100   | 99.84 | .     |
| 2015-TE-13539.fasta     | Chicken animals | Chicken    | T | .     | 100 | 100 | 99.9 | 100   | 99.84 | .     |
| 2015-TE-13540.fasta     | Chicken animals | Chicken    | T | 88.62 | .   | 100 | 99.9 | 100   | 100   | .     |
| 2015-TE-13544.fasta     | Chicken food    | Chicken    | T | 88.62 | .   | 100 | 99.9 | 100   | 100   | .     |
| 2015-TE-14308.fasta     | human           | Human      | T | .     | 100 | 100 | 100  | 100   | 100   | .     |
| 2015-TE-14447.fasta     | Chicken animals | Chicken    | I | .     | 100 | 100 | 100  | 100   | 100   | 99.9  |
| 2015-TE-14491-1-1.fasta | whitewagtail    | Wild_bird  | I | .     | 100 | 100 | 100  | 100   | 100   | 99.9  |
| 2015-TE-14493-1-1.fasta | starling        | Urban_bird | T | .     | 100 | 100 | 100  | 100   | 100   | .     |
| 2015-TE-14511.fasta     | Chicken animals | Chicken    | I | .     | 100 | 100 | 100  | 100   | 100   | 99.9  |
| 2015-TE-14523.fasta     | Chicken animals | Chicken    | I | 100   | .   | 100 | 99.9 | 100   | 100   | 100   |
| 2015-TE-14532.fasta     | Chicken animals | Chicken    | I | .     | 100 | 100 | 99.9 | 100   | 100   | 100   |
| 2015-TE-14618.fasta     | Chicken animals | Chicken    | I | .     | 100 | 100 | 100  | 100   | 100   | 99.9  |
| 2015-TE-14675.fasta     | Chicken animals | Chicken    | I | .     | 100 | 100 | 100  | 100   | 100   | 99.9  |
| 2015-TE-14798.fasta     | Chicken animals | Chicken    | I | .     | 100 | 100 | 100  | 100   | 100   | 99.9  |
| 2015-TE-14806.fasta     | Chicken food    | Chicken    | I | .     | 100 | 100 | 100  | 100   | 100   | 99.9  |
| 2015-TE-14855.fasta     | Chicken food    | Chicken    | I | .     | 100 | 100 | 100  | 100   | 100   | .     |
| 2015-TE-14856.fasta     | Chicken animals | Chicken    | I | .     | 100 | 100 | 100  | 100   | 100   | .     |
| 2015-TE-14865.fasta     | Chicken animals | Chicken    | I | .     | 100 | 100 | 100  | 100   | 100   | 99.9  |
| 2015-TE-14871.fasta     | Chicken food    | Chicken    | I | .     | 100 | 100 | 100  | 100   | 100   | 99.9  |
| 2015-TE-15342.fasta     | Chicken animals | Chicken    | I | 100   | .   | 100 | 99.9 | 100   | 100   | 100   |
| 2015-TE-15346.fasta     | Chicken food    | Chicken    | I | 100   | .   | 100 | 99.9 | 99.93 | 100   | 79.74 |
| 2015-TE-15582.fasta     | Chicken animals | Chicken    | I | .     | 100 | 100 | 100  | 100   | 100   | 99.9  |
| 2015-TE-15584.fasta     | Chicken animals | Chicken    | I | 100   | .   | 100 | 99.9 | 100   | 100   | 100   |
| 2015-TE-15588.fasta     | Chicken animals | Chicken    | I | 99.6  | .   | 100 | 99.9 | 100   | 100   | .     |
| 2015-TE-15873.fasta     | Chicken animals | Chicken    | T | .     | 100 | 100 | 100  | 100   | 100   | .     |
| 2015-TE-15879.fasta     | Chicken animals | Chicken    | I | .     | 100 | 100 | 100  | 100   | 100   | 99.9  |
| 2015-TE-15930.fasta     | Chicken animals | Chicken    | I | .     | 100 | 100 | 100  | 100   | 100   | 99.9  |
| 2015-TE-15934.fasta     | Chicken animals | Chicken    | I | .     | 100 | 100 | 100  | 100   | 100   | 99.9  |
| 2015-TE-15958.fasta     | Chicken animals | Chicken    | I | .     | 100 | 100 | 100  | 100   | 100   | 99.9  |
| 2015-TE-15988.fasta     | Chicken animals | Chicken    | I | 100   | .   | 100 | 99.9 | 100   | 100   | 100   |
| 2015-TE-16019.fasta     | Chicken food    | Chicken    | T | .     | 100 | 100 | 100  | 100   | 100   | .     |

|                         |                 |            |   |       |     |       |       |       |     |       |
|-------------------------|-----------------|------------|---|-------|-----|-------|-------|-------|-----|-------|
| 2015-TE-16020.fasta     | Chicken animals | Chicken    | I | .     | 100 | 100   | 100   | 100   | 100 | 99.9  |
| 2015-TE-16033.fasta     | Chicken animals | Chicken    | I | 100   | .   | 100   | 100   | 100   | 100 | .     |
| 2015-TE-16035.fasta     | Chicken food    | Chicken    | I | .     | 100 | 100   | 100   | 100   | 100 | 99.9  |
| 2015-TE-16051.fasta     | Chicken food    | Chicken    | I | .     | 100 | 100   | 100   | 100   | 100 | .     |
| 2015-TE-17432-1-1.fasta | magpie          | Urban_bird | T | .     | 100 | 100   | 99.9  | 100   | 100 | .     |
| 2015-TE-17433-1-1.fasta | magpie          | Urban_bird | T | 88.62 | .   | 100   | 100   | 100   | 100 | .     |
| 2015-TE-17434-1-1.fasta | magpie          | Urban_bird | T | .     | 100 | 100   | 99.9  | 100   | 100 | .     |
| 2015-TE-17435-1-1.fasta | magpie          | Urban_bird | T | .     | 100 | 100   | 99.9  | 100   | 100 | .     |
| 2015-TE-17436-1-1.fasta | magpie          | Urban_bird | T | .     | 100 | 100   | 99.9  | 100   | 100 | .     |
| 2015-TE-17622.fasta     | human           | Human      | I | .     | 100 | 100   | 100   | 100   | 100 | 99.9  |
| 2015-TE-17888.fasta     | Chicken animals | Chicken    | I | .     | 100 | 99.91 | 99.55 | 99.93 | 100 | 100   |
| 2015-TE-17890.fasta     | Chicken animals | Chicken    | I | .     | 100 | 100   | 100   | 100   | 100 | 99.9  |
| 2015-TE-17891.fasta     | Chicken animals | Chicken    | I | .     | 100 | 99.91 | 99.55 | 99.93 | 100 | 100   |
| 2015-TE-18078.fasta     | Chicken animals | Chicken    | I | .     | 100 | 100   | 100   | 100   | 100 | 99.9  |
| 2015-TE-18079.fasta     | Chicken animals | Chicken    | I | .     | 100 | 100   | 100   | 100   | 100 | 99.9  |
| 2015-TE-18082.fasta     | Chicken animals | Chicken    | I | 100   | .   | 100   | 99.9  | 100   | 100 | 100   |
| 2015-TE-18084.fasta     | Chicken animals | Chicken    | I | 100   | .   | 100   | 99.9  | 100   | 100 | 100   |
| 2015-TE-18086.fasta     | Chicken animals | Chicken    | I | .     | 100 | 100   | 100   | 100   | 100 | 99.9  |
| 2015-TE-18089.fasta     | Chicken animals | Chicken    | T | .     | 100 | 100   | 100   | 100   | 100 | .     |
| 2015-TE-18090.fasta     | Chicken animals | Chicken    | I | 100   | .   | 100   | 99.9  | 100   | 100 | 100   |
| 2015-TE-18091.fasta     | Chicken animals | Chicken    | I | 100   | .   | 100   | 99.9  | 100   | 100 | 100   |
| 2015-TE-18099.fasta     | Chicken animals | Chicken    | V | .     | 100 | 100   | 100   | 100   | 100 | 100   |
| 2015-TE-18178.fasta     | Chicken animals | Chicken    | I | 99.6  | .   | 100   | 99.9  | 100   | 100 | 23.23 |
| 2015-TE-18180.fasta     | Chicken animals | Chicken    | I | 99.6  | .   | 100   | 99.9  | 100   | 100 | .     |
| 2015-TE-18181.fasta     | Chicken animals | Chicken    | I | 99.6  | .   | 100   | 99.9  | 100   | 100 | .     |
| 2015-TE-18182.fasta     | Chicken animals | Chicken    | I | 99.6  | .   | 100   | 99.9  | 100   | 100 | .     |
| 2015-TE-18184.fasta     | Chicken animals | Chicken    | I | .     | 100 | 100   | 100   | 100   | 100 | 99.9  |
| 2015-TE-18185.fasta     | Chicken animals | Chicken    | I | .     | 100 | 100   | 100   | 100   | 100 | 99.9  |
| 2015-TE-18188.fasta     | Chicken animals | Chicken    | I | .     | 100 | 100   | 100   | 100   | 100 | 100   |
| 2015-TE-18193.fasta     | Chicken animals | Chicken    | I | .     | 100 | 100   | 100   | 100   | 100 | 99.9  |
| 2015-TE-18195.fasta     | Chicken animals | Chicken    | I | 100   | .   | 99.91 | 99.55 | 100   | 100 | 100   |
| 2015-TE-18196.fasta     | Chicken animals | Chicken    | I | 100   | .   | 99.91 | 99.55 | 100   | 100 | 100   |

|                         |                 |            |   |       |     |       |       |       |     |      |
|-------------------------|-----------------|------------|---|-------|-----|-------|-------|-------|-----|------|
| 2015-TE-18263.fasta     | Chicken animals | Chicken    | I | .     | .   | 100   | 99.9  | 100   | 100 | 99.9 |
| 2015-TE-18264.fasta     | Chicken animals | Chicken    | I | .     | .   | 100   | 99.9  | 100   | 100 | 99.9 |
| 2015-TE-18290.fasta     | Chicken animals | Chicken    | I | .     | 100 | 100   | 99.9  | 100   | 100 | 99.9 |
| 2015-TE-18298.fasta     | Chicken animals | Chicken    | I | .     | 100 | 100   | 99.9  | 100   | 100 | 99.9 |
| 2015-TE-18300.fasta     | Chicken animals | Chicken    | T | .     | 100 | 100   | 100   | 100   | 100 | 100  |
| 2015-TE-18304.fasta     | Chicken animals | Chicken    | T | .     | 100 | 100   | 100   | 100   | 100 | 100  |
| 2015-TE-18310.fasta     | Chicken animals | Chicken    | T | .     | 100 | 100   | 99.9  | 100   | 100 | .    |
| 2015-TE-18724.fasta     | Chicken animals | Chicken    | I | 100   | .   | 100   | 99.9  | 100   | 100 | 100  |
| 2015-TE-18869-1-1.fasta | Crow            | Urban_bird | T | 88.62 | .   | 100   | 100   | 100   | 100 | .    |
| 2015-TE-18871-1-1.fasta | Crow            | Urban_bird | T | 88.62 | .   | 100   | 100   | 100   | 100 | .    |
| 2015-TE-19309-1-1.fasta | Chicken animals | Chicken    | I | .     | .   | 100   | 99.9  | 100   | 100 | 99.9 |
| 2015-TE-19316.fasta     | Chicken animals | Chicken    | I | .     | 100 | 100   | 99.9  | 100   | 100 | 99.9 |
| 2015-TE-19322.fasta     | Chicken food    | Chicken    | I | .     | .   | 100   | 99.9  | 100   | 100 | 99.9 |
| 2015-TE-19324.fasta     | Chicken animals | Chicken    | I | 100   | .   | 99.91 | 99.55 | 99.93 | 100 | 100  |
| 2015-TE-19326.fasta     | Chicken food    | Chicken    | I | 100   | .   | 99.91 | 99.55 | 99.93 | 100 | 100  |
| 2015-TE-19331.fasta     | Chicken food    | Chicken    | I | .     | .   | 99.91 | 99.55 | 99.93 | 100 | .    |
| 2015-TE-19334.fasta     | Chicken food    | Chicken    | I | .     | .   | 100   | 99.9  | 100   | 100 | 99.9 |
| 2015-TE-19340.fasta     | Chicken animals | Chicken    | I | .     | 100 | 100   | 100   | 100   | 100 | 99.9 |
| 2015-TE-19477.fasta     | Chicken food    | Chicken    | I | .     | 100 | 100   | 99.9  | 100   | 100 | 100  |
| 2015-TE-19480.fasta     | Chicken animals | Chicken    | I | .     | 100 | 100   | 100   | 100   | 100 | 99.9 |
| 2015-TE-19482.fasta     | Chicken food    | Chicken    | I | 100   | .   | 99.91 | 99.55 | 100   | 100 | 100  |
| 2015-TE-19486.fasta     | Chicken food    | Chicken    | I | .     | 100 | 100   | 100   | 100   | 100 | 99.9 |
| 2015-TE-19487.fasta     | Chicken animals | Chicken    | I | .     | 100 | 100   | 100   | 100   | 100 | 99.9 |
| 2015-TE-19488.fasta     | Chicken animals | Chicken    | I | .     | 100 | 100   | 100   | 100   | 100 | 99.9 |
| 2015-TE-19489.fasta     | Chicken animals | Chicken    | I | .     | 100 | 100   | 100   | 100   | 100 | 99.9 |
| 2015-TE-19491.fasta     | Chicken animals | Chicken    | I | .     | 100 | 100   | 100   | 100   | 100 | 99.9 |
| 2015-TE-19492.fasta     | Chicken food    | Chicken    | I | .     | 100 | 100   | 100   | 100   | 100 | 99.9 |
| 2015-TE-19494.fasta     | Chicken food    | Chicken    | I | .     | 100 | 100   | 99.9  | 100   | 100 | 100  |
| 2015-TE-19498.fasta     | Chicken food    | Chicken    | I | .     | 100 | 99.91 | 99.55 | 99.93 | 100 | 100  |
| 2015-TE-19788.fasta     | Chicken animals | Chicken    | I | .     | .   | 100   | 99.9  | 100   | 100 | 99.9 |
| 2015-TE-19794.fasta     | Chicken animals | Chicken    | T | .     | 100 | 100   | 99.9  | 100   | 100 | .    |
| 2015-TE-19885.fasta     | Chicken animals | Chicken    | I | .     | 100 | 100   | 100   | 100   | 100 | 99.9 |

|                         |                 |           |   |       |             |                       |       |       |     |      |
|-------------------------|-----------------|-----------|---|-------|-------------|-----------------------|-------|-------|-----|------|
| 2015-TE-19904.fasta     | Chicken animals | Chicken   | I | 100   | .           | 100                   | 100   | 100   | 100 | 99.9 |
| 2015-TE-19909.fasta     | Chicken animals | Chicken   | I | 100   | .           | 100                   | 100   | 100   | 100 | 99.9 |
| 2015-TE-19962.fasta     | Chicken animals | Chicken   | I | 100   | .           | 100                   | 99.9  | 100   | 100 | 100  |
| 2015-TE-19973.fasta     | Chicken animals | Chicken   | I | 100   | .           | 99.91                 | 99.55 | 99.93 | 100 | 100  |
| 2015-TE-19991.fasta     | Chicken animals | Chicken   | T | .     | 100         | 100                   | 100   | 100   | 100 | 100  |
| 2015-TE-20117.fasta     | Chicken food    | Chicken   | I | .     | 100         | 100                   | 100   | 100   | 100 | 99.9 |
| 2015-TE-20118.fasta     | Chicken food    | Chicken   | I | .     | 100         | 100                   | 100   | 100   | 100 | 99.9 |
| 2015-TE-20121.fasta     | Chicken food    | Chicken   | I | .     | 100         | 100                   | 100   | 100   | 100 | 99.9 |
| 2015-TE-20126-1-1.fasta | owl             | Wild_bird | T | 97.19 | .           | 100                   | 99.9  | 100   | 100 | .    |
| 2015-TE-20389.fasta     | human           | Human     | I | .     | 100         | 100                   | 99.9  | 100   | 100 | .    |
| 2015-TE-20519-1-1.fasta | Chicken food    | Chicken   | I | .     | .           | 100                   | 99.9  | 100   | 100 | 99.9 |
| 2015-TE-20594.fasta     | human           | Human     | I | .     | .           | 100                   | 99.9  | 100   | 100 | 99.9 |
| 2015-TE-20596.fasta     | human           | Human     | T | .     | 100         | 100                   | 100   | 100   | 100 | .    |
| 2015-TE-20598.fasta     | human           | Human     | I | .     | 100         | 100                   | 100   | 100   | 100 | 99.9 |
| 2015-TE-20602.fasta     | human           | Human     | I | 97.32 | .           | 100                   | 99.9  | 100   | 100 | .    |
| 2015-TE-20607.fasta     | human           | Human     | I | .     | 100         | 100                   | 100   | 100   | 100 | 100  |
| 2015-TE-20614.fasta     | human           | Human     | T | .     | .           | 100                   | 99.9  | 100   | 100 | 100  |
| 2015-TE-20668.fasta     | Chicken animals | Chicken   | I | .     | .           | 100                   | 99.9  | 100   | 100 | 99.9 |
| 2015-TE-20672.fasta     | Chicken food    | Chicken   | I | .     | 100         | 100                   | 100   | 100   | 100 | 99.9 |
| 2015-TE-20674-1-1.fasta | Chicken animals | Chicken   | I | .     | 100         | 100                   | 100   | 100   | 100 | 99.9 |
| 2015-TE-20679.fasta     | Chicken food    | Chicken   | I | 100   | .           | 99.91                 | 99.55 | 99.93 | 100 | 100  |
| 2015-TE-20680.fasta     | Chicken animals | Chicken   | I | 100   | .           | 99.91                 | 99.55 | 99.93 | 100 | 100  |
| 2015-TE-20685.fasta     | Chicken animals | Chicken   | I | .     | 100         | 100                   | 100   | 100   | 100 | .    |
| 2015-TE-20691.fasta     | Chicken animals | Chicken   | V | .     | 7.11;100.00 | 16.65;88.05;4.98;6.24 | 100   | 100   | 100 | 100  |
| 2015-TE-20692.fasta     | Chicken animals | Chicken   | T | .     | 100         | 100                   | 100   | 100   | 100 | .    |
| 2015-TE-20693.fasta     | Chicken animals | Chicken   | I | .     | 100         | 100                   | 99.9  | 100   | 100 | 99.9 |
| 2015-TE-20696.fasta     | Chicken animals | Chicken   | I | 100   | .           | 99.91                 | 99.55 | 100   | 100 | 100  |
| 2015-TE-20698.fasta     | Chicken animals | Chicken   | I | .     | 100         | 100                   | 100   | 100   | 100 | 100  |
| 2015-TE-20702.fasta     | Chicken animals | Chicken   | I | .     | .           | 100                   | 99.9  | 100   | 100 | 99.9 |
| 2015-TE-20703.fasta     | Chicken animals | Chicken   | I | 100   | .           | 99.91                 | 99.55 | 100   | 100 | 100  |
| 2015-TE-20704.fasta     | Chicken animals | Chicken   | I | 100   | .           | 99.91                 | 99.55 | 100   | 100 | 100  |
| 2015-TE-20706.fasta     | Chicken animals | Chicken   | I | .     | 100         | 100                   | 99.9  | 100   | 100 | 99.9 |

|                         |                 |         |   |       |     |       |       |       |     |                   |
|-------------------------|-----------------|---------|---|-------|-----|-------|-------|-------|-----|-------------------|
| 2015-TE-20707.fasta     | Chicken animals | Chicken | I | 100   | .   | 99.91 | 99.55 | 99.93 | 100 | 39.38;45.99;20.26 |
| 2015-TE-20708.fasta     | Chicken animals | Chicken | I | .     | 100 | 100   | 100   | 100   | 100 | 100               |
| 2015-TE-20713.fasta     | Chicken animals | Chicken | I | 100   | .   | 100   | 99.9  | 100   | 100 | 99.9              |
| 2015-TE-20716.fasta     | Chicken food    | Chicken | I | 100   | .   | 100   | 99.9  | 100   | 100 | 99.9              |
| 2015-TE-20721.fasta     | Chicken food    | Chicken | I | 100   | .   | 100   | 99.9  | 100   | 100 | 100               |
| 2015-TE-20723.fasta     | Chicken animals | Chicken | V | .     | 100 | 100   | 100   | 100   | 100 | 100               |
| 2015-TE-20725.fasta     | Chicken animals | Chicken | I | .     | 100 | 100   | 100   | 100   | 100 | .                 |
| 2015-TE-20726-1-1.fasta | Chicken food    | Chicken | I | .     | 100 | 100   | 100   | 100   | 100 | .                 |
| 2015-TE-20733.fasta     | Chicken food    | Chicken | I | 100   | .   | 99.91 | 99.55 | 99.93 | 100 | 100               |
| 2015-TE-20744.fasta     | Chicken food    | Chicken | I | .     | 100 | 100   | 100   | 100   | 100 | 99.90;99.90       |
| 2015-TE-20756.fasta     | Chicken animals | Chicken | I | .     | 100 | 100   | 100   | 100   | 100 | 99.9              |
| 2015-TE-20764.fasta     | Chicken food    | Chicken | T | 88.62 | .   | 100   | 99.9  | 100   | 100 | .                 |
| 2015-TE-20770.fasta     | Chicken animals | Chicken | I | .     | .   | 100   | 99.9  | 100   | 100 | 99.9              |
| 2015-TE-20774.fasta     | Chicken food    | Chicken | I | .     | .   | 100   | 99.9  | 100   | 100 | 99.9              |
| 2015-TE-21506.fasta     | Chicken animals | Chicken | V | .     | 100 | 100   | 100   | 100   | 100 | 100               |
| 2015-TE-22020.fasta     | Chicken animals | Chicken | I | 100   | .   | 99.91 | 99.55 | 99.93 | 100 | 39.38;45.99;20.26 |
| 2015-TE-22656.fasta     | Chicken animals | Chicken | I | .     | 100 | 100   | 100   | 100   | 100 | 99.9              |
| 2015-TE-22940.fasta     | Chicken animals | Chicken | I | .     | 100 | 100   | 100   | 100   | 100 | 99.9              |
| 2015-TE-22942.fasta     | Chicken food    | Chicken | I | .     | 100 | 100   | 100   | 100   | 100 | 99.9              |
| 2015-TE-22943.fasta     | Chicken food    | Chicken | I | 100   | .   | 100   | 99.9  | 100   | 100 | 100               |
| 2015-TE-22953.fasta     | Chicken animals | Chicken | I | .     | 100 | 100   | 99.9  | 100   | 100 | 99.9              |
| 2015-TE-22955.fasta     | Chicken food    | Chicken | I | .     | 100 | 100   | 99.9  | 100   | 100 | 99.9              |
| 2015-TE-22961.fasta     | Chicken animals | Chicken | I | .     | 100 | 99.91 | 99.55 | 99.93 | 100 | 100               |
| 2015-TE-22962.fasta     | Chicken food    | Chicken | I | .     | 100 | 99.91 | 99.55 | 99.93 | 100 | 100               |
| 2015-TE-23067.fasta     | Chicken animals | Chicken | I | 100   | .   | 99.91 | 99.55 | 99.93 | 100 | 100               |
| 2015-TE-23071.fasta     | Chicken animals | Chicken | I | .     | .   | 100   | 99.9  | 100   | 100 | 99.9              |
| 2015-TE-23074.fasta     | Chicken animals | Chicken | T | .     | .   | 100   | 100   | 100   | 100 | .                 |
| 2015-TE-23773.fasta     | Chicken animals | Chicken | I | .     | 100 | 99.91 | 99.55 | 99.93 | 100 | 100               |
| 2015-TE-23774.fasta     | Chicken food    | Chicken | I | .     | 100 | 99.91 | 99.55 | 99.93 | 100 | 100               |
| 2015-TE-23780.fasta     | Chicken animals | Chicken | I | .     | 100 | 100   | 100   | 100   | 100 | .                 |
| 2015-TE-23789-1-1.fasta | Chicken animals | Chicken | I | 100   | .   | 99.91 | 99.55 | 99.93 | 100 | 100               |
| 2015-TE-23790.fasta     | Chicken food    | Chicken | I | 100   | .   | 99.91 | 99.55 | 99.93 | 100 | 100               |



|                         |                 |         |   |     |     |       |       |                               |     |     |      |
|-------------------------|-----------------|---------|---|-----|-----|-------|-------|-------------------------------|-----|-----|------|
| 2015-TE-25089.fasta     | Chicken animals | Chicken | I | .   | 100 | 100   | 100   | 100                           | 100 | 100 | 99.9 |
| 2015-TE-25090.fasta     | Chicken animals | Chicken | T | .   | 100 | 100   | 99.9  | 100                           | 100 | 100 | .    |
| 2015-TE-25795.fasta     | Chicken animals | Chicken | I | .   | 100 | 100   | 100   | 100                           | 100 | 100 | .    |
| 2015-TE-25797.fasta     | Chicken animals | Chicken | I | .   | 100 | 100   | 100   | 100                           | 100 | 100 | 99.9 |
| 2015-TE-25798.fasta     | Chicken animals | Chicken | T | .   | 100 | 100   | 99.9  | 100                           | 100 | 100 | .    |
| 2015-TE-25799.fasta     | Chicken animals | Chicken | I | 100 | .   | 100   | 99.9  | 100                           | 100 | 100 | 100  |
| 2015-TE-25804.fasta     | Chicken animals | Chicken | I | .   | .   | 100   | 100   | 100                           | 100 | 100 | .    |
| 2015-TE-25809.fasta     | Chicken animals | Chicken | I | .   | 100 | 100   | 100   | 100                           | 100 | 100 | 99.9 |
| 2015-TE-26013.fasta     | Chicken animals | Chicken | I | 100 | .   | 99.91 | 99.55 | 99.93                         | 100 | 100 | 100  |
| 2015-TE-26646-1-1.fasta | Chicken food    | Chicken | I | .   | 100 | 100   | 100   | 100                           | 100 | 100 | 99.9 |
| 2015-TE-26647-1-1.fasta | Chicken food    | Chicken | T | .   | 100 | 100   | 100   | 100                           | 100 | 100 | .    |
| 2015-TE-26909.fasta     | Chicken animals | Chicken | I | 100 | .   | 100   | 99.9  | 99,93                         | 100 | 100 | 100  |
| 2015-TE-26910.fasta     | Chicken food    | Chicken | I | 100 | .   | 100   | 99.9  | 99.93                         | 100 | 100 | 100  |
| 2015-TE-26928.fasta     | Chicken animals | Chicken | I | 100 | .   | 100   | 99.9  | 99.93                         | 100 | 100 | 100  |
| 2015-TE-26930.fasta     | Chicken animals | Chicken | I | .   | 100 | 100   | 100   | 100                           | 100 | 100 | 99.9 |
| 2015-TE-26934.fasta     | Chicken animals | Chicken | I | .   | .   | 100   | 100   | 100                           | 100 | 100 | .    |
| 2015-TE-27015.fasta     | Chicken food    | Chicken | I | 100 | .   | 100   | 99.9  | 100                           | 100 | 100 | 100  |
| 2015-TE-27162.fasta     | Chicken animals | Chicken | I | .   | 100 | 100   | 100   | 100                           | 100 | 100 | 99.9 |
| 2015-TE-27165.fasta     | Chicken animals | Chicken | I | 100 | .   | 100   | 100   | 100                           | 100 | 100 | .    |
| 2015-TE-27202.fasta     | Chicken animals | Chicken | I | .   | 100 | 100   | 100   | 100                           | 100 | 100 | 99.9 |
| 2015-TE-27206.fasta     | Chicken animals | Chicken | I | .   | 100 | 100   | 100   | 100                           | 100 | 100 | 99.9 |
| 2015-TE-27207.fasta     | Chicken animals | Chicken | I | .   | 100 | 100   | 100   | 41.65;16.29;16.29;16.29;74.65 | 100 | 100 | 99.9 |
| 2015-TE-27218.fasta     | Chicken animals | Chicken | I | 100 | .   | 99.91 | 99.55 | 99.93                         | 100 | 100 | 100  |
| 2015-TE-27228.fasta     | Chicken animals | Chicken | I | .   | 100 | 100   | 100   | 100                           | 100 | 100 | 99.9 |
| 2015-TE-27230.fasta     | Chicken animals | Chicken | I | .   | 100 | 100   | 100   | 100                           | 100 | 100 | 99.9 |
| 2015-TE-27231.fasta     | Chicken animals | Chicken | I | .   | 100 | 100   | 100   | 100                           | 100 | 100 | 99.9 |
| 2015-TE-27232-1-1.fasta | Chicken food    | Chicken | I | .   | 100 | 100   | 100   | 100                           | 100 | 100 | 99.9 |
| 2015-TE-27233.fasta     | Chicken animals | Chicken | I | .   | 100 | 100   | 100   | 100                           | 100 | 100 | 99.9 |
| 2015-TE-27236-1-1.fasta | Chicken food    | Chicken | T | .   | 100 | 100   | 100   | 100                           | 100 | 100 | .    |
| 2015-TE-27237.fasta     | Chicken animals | Chicken | I | .   | 100 | 100   | 100   | 100                           | 100 | 100 | .    |
| 2015-TE-27553-1-1.fasta | Chicken food    | Chicken | I | .   | 100 | 100   | 100   | 100                           | 100 | 100 | 99.9 |
| 2015-TE-27554-1-1.fasta | Chicken food    | Chicken | I | 100 | .   | 100   | 99.9  | 100                           | 100 | 100 | 99.9 |



|                         |                 |            |   |       |       |       |       |       |       |                   |
|-------------------------|-----------------|------------|---|-------|-------|-------|-------|-------|-------|-------------------|
| 2015-TE-27556-1-1.fasta | Chicken food    | Chicken    | T | .     | 93.54 | 100   | 99.9  | 99.93 | 100   | .                 |
| 2015-TE-27604.fasta     | Chicken animals | Chicken    | I | .     | 100   | 100   | 100   | 100   | 100   | .                 |
| 2015-TE-27605.fasta     | Chicken animals | Chicken    | I | 100   | .     | 99.91 | 99.55 | 99.93 | 100   | 100               |
| 2015-TE-27608.fasta     | Chicken animals | Chicken    | T | .     | 100   | 100   | 99.9  | 100   | 99.84 | .                 |
| 2015-TE-27611.fasta     | Chicken animals | Chicken    | T | .     | 100   | 100   | 99.9  | 100   | 99.84 | .                 |
| 2015-TE-27612.fasta     | Chicken animals | Chicken    | I | 100   | .     | 100   | 100   | 100   | 100   | .                 |
| 2015-TE-27626.fasta     | Chicken food    | Chicken    | T | .     | 100   | 100   | 100   | 100   | 100   | .                 |
| 2015-TE-27628.fasta     | Chicken food    | Chicken    | I | 100   | .     | 99.91 | 99.55 | 100   | 100   | 100               |
| 2015-TE-27635.fasta     | Chicken food    | Chicken    | T | .     | 100   | 100   | 100   | 100   | 100   | .                 |
| 2015-TE-27642.fasta     | Chicken animals | Chicken    | T | .     | 93.54 | 100   | 99.9  | 99.93 | 100   | .                 |
| 2015-TE-27644.fasta     | Chicken food    | Chicken    | T | .     | 93.54 | 100   | 99.9  | 99.93 | 100   | .                 |
| 2015-TE-28098.fasta     | Chicken food    | Chicken    | T | .     | 93.54 | 100   | 99.9  | 99.93 | 100   | .                 |
| 2015-TE-28133.fasta     | Chicken food    | Chicken    | T | .     | 93.54 | 100   | 99.9  | 99.93 | 100   | .                 |
| 2015-TE-28139.fasta     | Chicken food    | Chicken    | I | .     | 100   | 100   | 100   | 100   | 100   | 100               |
| 2015-TE-28140.fasta     | Chicken animals | Chicken    | I | .     | 100   | 100   | 100   | 100   | 100   | 100               |
| 2015-TE-28147.fasta     | Chicken food    | Chicken    | T | 97.19 | .     | 100   | 99.9  | 100   | 100   | .                 |
| 2015-TE-28179-1-1.fasta | Chicken food    | Chicken    | I | 100   | .     | 99.91 | 99.55 | 100   | 100   | 100               |
| 2015-TE-28365-1-1.fasta | pigeons         | Urban_bird | T | 99.6  | .     | 100   | 99.9  | 100   | 100   | .                 |
| 2015-TE-28416.fasta     | Chicken animals | Chicken    | I | 100   | .     | 99.91 | 99.55 | 99.93 | 100   | 100               |
| 2015-TE-28417.fasta     | Chicken animals | Chicken    | I | .     | 100   | 100   | 100   | 100   | 100   | 99.9              |
| 2015-TE-28882-1-1.fasta | Chicken food    | Chicken    | I | .     | .     | 100   | 99.9  | 100   | 100   | 99.9              |
| 2015-TE-28884-1-1.fasta | Chicken food    | Chicken    | I | 100   | .     | 99.91 | 99.55 | 99.93 | 100   | 100               |
| 2015-TE-28885-1-1.fasta | Chicken food    | Chicken    | I | .     | 100   | 100   | 99.9  | 100   | 100   | 100               |
| 2015-TE-29065-1-1.fasta | Chicken food    | Chicken    | I | 100   | .     | 99.91 | 99.55 | 100   | 100   | 39.38;45.99;20.26 |
| 2015-TE-29068-1-1.fasta | Chicken food    | Chicken    | I | .     | 100   | 100   | 100   | 100   | 100   | .                 |
| 2015-TE-29222.fasta     | Chicken food    | Chicken    | I | .     | .     | 100   | 99.9  | 100   | 100   | 99.9              |
| 2015-TE-29232.fasta     | Chicken food    | Chicken    | I | .     | 100   | 100   | 99.9  | 100   | 100   | 99.9              |
| 2015-TE-29243.fasta     | Chicken food    | Chicken    | I | .     | 100   | 100   | 99.9  | 100   | 100   | 100               |
| 2015-TE-29919.fasta     | Chicken animals | Chicken    | I | .     | 100   | 100   | 100   | 100   | 100   | .                 |
| 2015-TE-29920.fasta     | Chicken food    | Chicken    | I | .     | 100   | 100   | 100   | 100   | 100   | 99.9              |
| 2015-TE-29928.fasta     | Chicken animals | Chicken    | T | .     | 100   | 100   | 100   | 100   | 100   | .                 |
| 2015-TE-29930.fasta     | Chicken food    | Chicken    | T | .     | 100   | 100   | 100   | 100   | 100   | .                 |

|                         |                 |            |   |             |     |       |       |       |     |      |
|-------------------------|-----------------|------------|---|-------------|-----|-------|-------|-------|-----|------|
| 2015-TE-29940.fasta     | Chicken animals | Chicken    | T | .           | 100 | 100   | 100   | 100   | 100 | .    |
| 2015-TE-29958.fasta     | Chicken food    | Chicken    | I | 100         | .   | 100   | 99.9  | 100   | 100 | 99.9 |
| 2015-TE-29967-1-1.fasta | Crow            | Urban_bird | T | 86.88;10.17 | .   | 100   | 100   | 100   | 100 | 100  |
| 2015-TE-29969-1-1.fasta | pigeons         | Urban_bird | T | 99.6        | .   | 100   | 99.9  | 100   | 100 | .    |
| 2015-TE-29984.fasta     | Chicken food    | Chicken    | I | 100         | .   | 100   | 99.9  | 100   | 100 | 99.9 |
| 2015-TE-29992-1-1.fasta | Chicken food    | Chicken    | I | .           | 100 | 100   | 100   | 100   | 100 | .    |
| 2015-TE-29993-1-1.fasta | Chicken food    | Chicken    | T | .           | 100 | 100   | 100   | 100   | 100 | .    |
| 2015-TE-29994-1-1.fasta | Chicken food    | Chicken    | I | .           | 100 | 99.91 | 99.55 | 99.93 | 100 | 100  |
| 2015-TE-29995-1-1.fasta | Chicken food    | Chicken    | I | 100         | .   | 100   | 100   | 100   | 100 | .    |
| 2015-TE-30001-1-1.fasta | pigeons         | Urban_bird | T | 97.19       | .   | 100   | 100   | 100   | 100 | .    |
| 2015-TE-30018.fasta     | Chicken food    | Chicken    | I | 100         | .   | 99.91 | 99.55 | 100   | 100 | 100  |
| 2015-TE-30024.fasta     | Chicken food    | Chicken    | I | .           | 100 | 100   | 100   | 100   | 100 | 99.9 |
| 2015-TE-30028.fasta     | Chicken food    | Chicken    | I | .           | .   | 100   | 99.9  | 100   | 100 | 99.9 |
| 2015-TE-30051.fasta     | Chicken animals | Chicken    | I | .           | 100 | 100   | 100   | 100   | 100 | 99.9 |
| 2015-TE-30052.fasta     | Chicken animals | Chicken    | I | 100         | .   | 100   | 99.9  | 100   | 100 | 99.9 |
| 2015-TE-30056.fasta     | Chicken animals | Chicken    | I | 100         | .   | 99.91 | 99.55 | 99.93 | 100 | 100  |
| 2015-TE-30060.fasta     | Chicken animals | Chicken    | I | .           | 100 | 100   | 100   | 100   | 100 | 99.9 |
| 2015-TE-30063.fasta     | Chicken animals | Chicken    | T | .           | 100 | 100   | 99.55 | 100   | 100 | 100  |
| 2015-TE-30072.fasta     | Chicken animals | Chicken    | I | .           | 100 | 100   | 100   | 100   | 100 | 99.9 |
| 2015-TE-30076.fasta     | Chicken animals | Chicken    | I | 100         | .   | 99.91 | 99.55 | 99.93 | 100 | 100  |
| 2015-TE-30081.fasta     | Chicken animals | Chicken    | I | 100         | .   | 99.91 | 99.55 | 99.93 | 100 | 100  |
| 2015-TE-30404.fasta     | Chicken food    | Chicken    | I | .           | 100 | 100   | 99.9  | 100   | 100 | 99.9 |
| 2015-TE-30407.fasta     | Chicken food    | Chicken    | I | .           | 100 | 100   | 100   | 100   | 100 | .    |
| 2015-TE-30414.fasta     | Chicken food    | Chicken    | I | .           | 100 | 100   | 99.9  | 100   | 100 | 99.9 |
| 2015-TE-30420.fasta     | Chicken food    | Chicken    | I | .           | 100 | 100   | 100   | 100   | 100 | 99.9 |
| 2015-TE-30429.fasta     | Chicken food    | Chicken    | T | .           | 100 | 100   | 99.9  | 100   | 100 | 100  |
| 2015-TE-30430.fasta     | Chicken animals | Chicken    | T | .           | 100 | 100   | 99.9  | 100   | 100 | 100  |
| 2015-TE-30432.fasta     | Chicken animals | Chicken    | I | 100         | .   | 99.91 | 99.55 | 99.93 | 100 | 100  |
| 2015-TE-30433.fasta     | Chicken food    | Chicken    | I | 100         | .   | 99.91 | 99.55 | 99.93 | 100 | 100  |
| 2015-TE-30439.fasta     | Chicken food    | Chicken    | T | .           | 100 | 100   | 100   | 100   | 100 | .    |
| 2015-TE-30440.fasta     | Chicken animals | Chicken    | T | .           | 100 | 100   | 100   | 100   | 100 | .    |
| 2015-TE-30441.fasta     | Chicken food    | Chicken    | T | .           | 100 | 100   | 100   | 100   | 100 | .    |



|                         |                 |            |   |       |     |       |       |       |     |      |
|-------------------------|-----------------|------------|---|-------|-----|-------|-------|-------|-----|------|
| 2015-TE-31511-1-1.fasta | Chicken food    | Chicken    | I | 100   | .   | 99.91 | 99.55 | 99.93 | 100 | 100  |
| 2015-TE-31514-1-1.fasta | Chicken food    | Chicken    | I | .     | 100 | 100   | 99.9  | 100   | 100 | 100  |
| 2015-TE-31718-1-1.fasta | pigeons         | Urban_bird | T | 88.62 | .   | 100   | 100   | 100   | 100 | 100  |
| 2015-TE-31719-1-1.fasta | pigeons         | Urban_bird | T | 88.62 | .   | 100   | 100   | 100   | 100 | 100  |
| 2015-TE-31824-1-1.fasta | Chicken food    | Chicken    | I | .     | 100 | 100   | 100   | 100   | 100 | 99.9 |
| 2015-TE-32242-1-1.fasta | Chicken food    | Chicken    | I | 100   | .   | 100   | 100   | 100   | 100 | .    |
| 2015-TE-32243-1-1.fasta | Chicken food    | Chicken    | I | .     | 100 | 100   | 99.9  | 100   | 100 | 100  |
| 2015-TE-32254-1-1.fasta | Chicken food    | Chicken    | I | 100   | .   | 99.91 | 99.55 | 99.93 | 100 | 100  |
| 2015-TE-32262-1-1.fasta | Chicken food    | Chicken    | T | .     | 100 | 100   | 100   | 100   | 100 | .    |
| 2015-TE-32276-1-1.fasta | Chicken food    | Chicken    | T | .     | 100 | 100   | 100   | 100   | 100 | .    |
| 2015-TE-32615-1-1.fasta | Chicken food    | Chicken    | T | .     | 100 | 100   | 99.9  | 100   | 100 | 99.9 |
| 2015-TE-32617-1-1.fasta | Chicken food    | Chicken    | I | .     | 100 | 100   | 99.9  | 100   | 100 | 100  |
| 2015-TE-32620-1-1.fasta | Chicken food    | Chicken    | I | .     | 100 | 100   | 99.55 | 99.93 | 100 | .    |
| 2015-TE-32621-1-1.fasta | Chicken food    | Chicken    | T | 97.19 | .   | 100   | 99.9  | 100   | 100 | .    |
| 2015-TE-32622-1-1.fasta | Chicken food    | Chicken    | T | .     | 100 | 100   | 100   | 100   | 100 | .    |
| 2015-TE-32719.fasta     | Chicken animals | Chicken    | I | 100   | .   | 100   | 99.9  | 100   | 100 | 100  |
| 2015-TE-32739.fasta     | Chicken animals | Chicken    | I | 100   | .   | 99.91 | 99.55 | 100   | 100 | 99.9 |
| 2015-TE-32740.fasta     | Chicken animals | Chicken    | I | 100   | .   | 99.91 | 99.55 | 100   | 100 | 99.9 |
| 2015-TE-32741.fasta     | Chicken animals | Chicken    | I | 100   | .   | 100   | 99.9  | 100   | 100 | 100  |
| 2015-TE-32742.fasta     | Chicken animals | Chicken    | I | 100   | .   | 100   | 99.9  | 100   | 100 | 100  |
| 2015-TE-32743.fasta     | Chicken animals | Chicken    | I | 100   | .   | 100   | 99.9  | 100   | 100 | 100  |
| 2015-TE-33101.fasta     | Chicken animals | Chicken    | I | 100   | .   | 99.91 | 99.55 | 100   | 100 | 99.9 |
| 2015-TE-33154-1-1.fasta | Chicken food    | Chicken    | I | .     | 100 | 100   | 100   | 100   | 100 | .    |
| 2015-TE-33155-1-1.fasta | Chicken food    | Chicken    | I | .     | 100 | 100   | 99.9  | 100   | 100 | 99.9 |
| 2015-TE-33156-1-1.fasta | Chicken food    | Chicken    | I | .     | 100 | 100   | 99.9  | 100   | 100 | 99.9 |
| 2015-TE-33159-1-1.fasta | Chicken food    | Chicken    | I | .     | 100 | 100   | 100   | 100   | 100 | 99.9 |
| 2015-TE-33163.fasta     | Chicken food    | Chicken    | I | 100   | .   | 99.91 | 99.55 | 99.93 | 100 | 100  |
| 2015-TE-33167.fasta     | Chicken food    | Chicken    | I | 100   | .   | 99.91 | 99.55 | 99.93 | 100 | 100  |
| 2015-TE-33233-1-1.fasta | Chicken food    | Chicken    | I | .     | 100 | 100   | 100   | 100   | 100 | .    |
| 2015-TE-33236.fasta     | Chicken food    | Chicken    | I | .     | 100 | 100   | 100   | 100   | 100 | 99.9 |
| 2015-TE-33240.fasta     | Chicken food    | Chicken    | I | .     | 100 | 100   | 100   | 100   | 100 | .    |
| 2015-TE-33241.fasta     | Chicken animals | Chicken    | I | 100   | .   | 99.91 | 99.55 | 99.93 | 100 | 100  |

|                         |                 |            |   |       |     |       |       |       |     |                   |
|-------------------------|-----------------|------------|---|-------|-----|-------|-------|-------|-----|-------------------|
| 2015-TE-33243.fasta     | Chicken food    | Chicken    | I | .     | 100 | 100   | 100   | 100   | 100 | .                 |
| 2015-TE-33589-1-1.fasta | Chicken food    | Chicken    | I | .     | 100 | 100   | 100   | 100   | 100 | 99.9              |
| 2015-TE-33718-1-1.fasta | Chicken food    | Chicken    | I | .     | .   | 100   | 100   | 100   | 100 | .                 |
| 2015-TE-33720-1-1.fasta | Chicken food    | Chicken    | I | .     | 100 | 100   | 100   | 100   | 100 | 99.9              |
| 2015-TE-33722-1-1.fasta | Chicken food    | Chicken    | I | 100   | .   | 100   | 99.9  | 100   | 100 | 100               |
| 2015-TE-33723-1-1.fasta | Chicken food    | Chicken    | I | .     | .   | 100   | 99.9  | 100   | 100 | 99.9              |
| 2015-TE-33724-1-1.fasta | Chicken food    | Chicken    | I | .     | 100 | 100   | 99.9  | 100   | 100 | 99.9              |
| 2015-TE-33727-1-1.fasta | Chicken food    | Chicken    | I | .     | 100 | 100   | 99.9  | 100   | 100 | 100               |
| 2015-TE-33728-1-1.fasta | Chicken food    | Chicken    | I | .     | .   | 100   | 99.9  | 100   | 100 | 99.9              |
| 2015-TE-33729-1-1.fasta | Chicken food    | Chicken    | I | .     | .   | 100   | 100   | 100   | 100 | .                 |
| 2015-TE-33733.fasta     | Chicken animals | Chicken    | I | 100   | .   | 100   | 99.9  | 100   | 100 | 100               |
| 2015-TE-33740-1-1.fasta | pigeons         | Urban_bird | T | 88.62 | .   | 100   | 100   | 100   | 100 | 10.94             |
| 2015-TE-33856-1-1.fasta | Chicken food    | Chicken    | I | .     | 100 | 100   | 100   | 100   | 100 | 15.36;23.39;17.40 |
| 2015-TE-33858-1-1.fasta | Chicken food    | Chicken    | I | .     | 100 | 100   | 100   | 100   | 100 | 99.9              |
| 2015-TE-33859-1-1.fasta | Chicken food    | Chicken    | I | 100   | .   | 100   | 99.9  | 100   | 100 | 100               |
| 2015-TE-7900.fasta      | human           | Human      | I | .     | .   | 100   | 99.9  | 100   | 100 | .                 |
| 2015-TE-8887.fasta      | Chicken food    | Chicken    | I | 100   | .   | 100   | 100   | 100   | 100 | .                 |
| 2015-TE-8888.fasta      | Chicken animals | Chicken    | I | .     | .   | 100   | 99.9  | 100   | 100 | 99.9              |
| 2015-TE-9163.fasta      | Chicken food    | Chicken    | T | .     | 100 | 100   | 99.9  | 100   | 100 | .                 |
| 2015-TE-9178.fasta      | Chicken animals | Chicken    | I | .     | 100 | 100   | 100   | 100   | 100 | 99.9              |
| 2015-TE-9523.fasta      | Chicken food    | Chicken    | I | 100   | .   | 99.91 | 99.55 | 99.93 | 100 | 99.9              |
| 2015-TE-9530.fasta      | Chicken animals | Chicken    | I | .     | 100 | 100   | 100   | 100   | 100 | 99.9              |
| 2015-TE-9549.fasta      | Chicken food    | Chicken    | I | .     | 100 | 100   | 100   | 100   | 100 | 99.9              |
| 2015-TE-9553.fasta      | Chicken food    | Chicken    | I | .     | 100 | 100   | 100   | 100   | 100 | 99.9              |
| 2015-TE-9841.fasta      | Chicken animals | Chicken    | I | 100   | .   | 100   | 99.9  | 100   | 100 | 100               |
| 2015-TE-9842.fasta      | Chicken animals | Chicken    | I | 100   | .   | 100   | 99.9  | 100   | 100 | 100               |
| 2016-TE-10005-1-1.fasta | Chicken food    | Chicken    | I | .     | 100 | 100   | 100   | 100   | 100 | 99.9              |
| 2016-TE-1005.fasta      | human           | Human      | T | .     | 100 | 100   | 99.9  | 100   | 100 | .                 |
| 2016-TE-1008.fasta      | human           | Human      | I | .     | 100 | 99.91 | 99.55 | 99.93 | 100 | .                 |
| 2016-TE-1017.fasta      | Chicken animals | Chicken    | I | .     | 100 | 100   | 99.9  | 100   | 100 | 99.9              |
| 2016-TE-1021.fasta      | human           | Human      | I | .     | 100 | 100   | 100   | 100   | 100 | .                 |
| 2016-TE-1022.fasta      | human           | Human      | I | .     | .   | 99.91 | 99.55 | 99.93 | 100 | .                 |

|                         |                 |            |   |       |     |       |       |       |     |      |
|-------------------------|-----------------|------------|---|-------|-----|-------|-------|-------|-----|------|
| 2016-TE-1025.fasta      | human           | Human      | I | .     | .   | 99.91 | 99.55 | 99.93 | 100 | 99.9 |
| 2016-TE-1027.fasta      | Chicken animals | Chicken    | I | .     | 100 | 100   | 100   | 100   | 100 | 99.9 |
| 2016-TE-1028-1-1.fasta  | Chicken food    | Chicken    | I | .     | 100 | 100   | 100   | 100   | 100 | .    |
| 2016-TE-10309-1-1.fasta | pigeons         | Urban_bird | T | 100   | .   | 100   | 99.9  | 100   | 100 | .    |
| 2016-TE-10310-1-1.fasta | pigeons         | Urban_bird | T | 99.6  | .   | 100   | 99.9  | 100   | 100 | .    |
| 2016-TE-10404.fasta     | Chicken animals | Chicken    | I | 100   | .   | 100   | 99.9  | 100   | 100 | 100  |
| 2016-TE-10405.fasta     | Chicken animals | Chicken    | I | 100   | .   | 100   | 99.9  | 100   | 100 | 100  |
| 2016-TE-10406.fasta     | Chicken animals | Chicken    | I | 100   | .   | 100   | 99.9  | 100   | 100 | 100  |
| 2016-TE-1043.fasta      | human           | Human      | T | .     | .   | 100   | 100   | 100   | 100 | .    |
| 2016-TE-1045.fasta      | Chicken animals | Chicken    | I | .     | 100 | 100   | 100   | 100   | 100 | 99.9 |
| 2016-TE-1056.fasta      | Chicken animals | Chicken    | I | 100   | .   | 100   | 99.9  | 100   | 100 | 100  |
| 2016-TE-10662.fasta     | Chicken animals | Chicken    | T | 97.19 | .   | 100   | 99.9  | 100   | 100 | .    |
| 2016-TE-10663.fasta     | Chicken animals | Chicken    | T | 97.19 | .   | 100   | 99.9  | 100   | 100 | .    |
| 2016-TE-10664.fasta     | Chicken animals | Chicken    | T | 97.19 | .   | 100   | 99.9  | 100   | 100 | .    |
| 2016-TE-1072-1-1.fasta  | Chicken food    | Chicken    | I | 100   | .   | 100   | 99.9  | 100   | 100 | 100  |
| 2016-TE-1073-1-1.fasta  | Chicken food    | Chicken    | I | .     | 100 | 100   | 100   | 100   | 100 | 99.9 |
| 2016-TE-1075-1-1.fasta  | Chicken food    | Chicken    | I | .     | 100 | 100   | 100   | 100   | 100 | .    |
| 2016-TE-1076-1-1.fasta  | Chicken food    | Chicken    | I | .     | .   | 100   | 100   | 100   | 100 | .    |
| 2016-TE-10782-1-1.fasta | Chicken food    | Chicken    | I | .     | 100 | 100   | 100   | 100   | 100 | .    |
| 2016-TE-10783-1-1.fasta | Chicken food    | Chicken    | I | .     | 100 | 100   | 100   | 100   | 100 | 99.9 |
| 2016-TE-10784-1-1.fasta | Chicken food    | Chicken    | I | .     | 100 | 100   | 100   | 100   | 100 | 99.9 |
| 2016-TE-10785-1-1.fasta | Chicken food    | Chicken    | I | .     | 100 | 100   | 100   | 100   | 100 | .    |
| 2016-TE-10787-1-1.fasta | Chicken food    | Chicken    | I | 100   | .   | 100   | 99.9  | 100   | 100 | 100  |
| 2016-TE-10838.fasta     | Chicken food    | Chicken    | T | 97.19 | .   | 100   | 99.9  | 100   | 100 | .    |
| 2016-TE-10839.fasta     | Chicken food    | Chicken    | T | 97.19 | .   | 100   | 99.9  | 100   | 100 | .    |
| 2016-TE-10840.fasta     | Chicken food    | Chicken    | T | 97.19 | .   | 100   | 99.9  | 100   | 100 | .    |
| 2016-TE-10879-1-1.fasta | Chicken food    | Chicken    | T | .     | 100 | 100   | 100   | 100   | 100 | .    |
| 2016-TE-1111.fasta      | Chicken animals | Chicken    | I | .     | 100 | 100   | 100   | 100   | 100 | 99.9 |
| 2016-TE-1117.fasta      | Chicken animals | Chicken    | I | .     | 100 | 100   | 100   | 100   | 100 | 99.9 |
| 2016-TE-1118.fasta      | Chicken animals | Chicken    | I | .     | 100 | 100   | 100   | 100   | 100 | 99.9 |
| 2016-TE-1124.fasta      | Chicken animals | Chicken    | I | 100   | .   | 99.91 | 99.55 | 99.93 | 100 | 100  |
| 2016-TE-1132.fasta      | Chicken animals | Chicken    | I | .     | 100 | 100   | 100   | 100   | 100 | .    |



|                         |                 |            |   |       |     |       |       |     |     |      |
|-------------------------|-----------------|------------|---|-------|-----|-------|-------|-----|-----|------|
| 2016-TE-16561-1-1.fasta | Chicken food    | Chicken    | I | .     | 100 | 100   | 100   | 100 | 100 | .    |
| 2016-TE-16562-1-1.fasta | Chicken food    | Chicken    | I | 100   | .   | 100   | 99.9  | 100 | 100 | 100  |
| 2016-TE-16564-1-1.fasta | Chicken food    | Chicken    | I | 100   | .   | 100   | 99.9  | 100 | 100 | 99.9 |
| 2016-TE-16565-1-1.fasta | Chicken food    | Chicken    | I | 100   | .   | 100   | 99.9  | 100 | 100 | 100  |
| 2016-TE-16566-1-1.fasta | Chicken food    | Chicken    | I | .     | 100 | 100   | 100   | 100 | 100 | 99.9 |
| 2016-TE-16567-1-1.fasta | Chicken food    | Chicken    | I | .     | 100 | 100   | 100   | 100 | 100 | 100  |
| 2016-TE-16568-1-1.fasta | Chicken food    | Chicken    | I | .     | 100 | 100   | 100   | 100 | 100 | 100  |
| 2016-TE-1682-1-1.fasta  | Chicken animals | Chicken    | I | .     | 100 | 100   | 100   | 100 | 100 | 99.9 |
| 2016-TE-1958-1-1.fasta  | Chicken food    | Chicken    | I | .     | 100 | 99.91 | 99.55 | 100 | 100 | 100  |
| 2016-TE-1960-1-1.fasta  | Chicken food    | Chicken    | I | .     | 100 | 100   | 100   | 100 | 100 | 99.9 |
| 2016-TE-1962-1-1.fasta  | Chicken food    | Chicken    | I | .     | 100 | 100   | 100   | 100 | 100 | .    |
| 2016-TE-20375-1-1.fasta | Crow            | Urban_bird | T | 97.19 | .   | 100   | 100   | 100 | 100 | .    |
| 2016-TE-20407-1-1.fasta | human           | Human      | I | 100   | .   | 100   | 99.9  | 100 | 100 | 100  |
| 2016-TE-22529-1-1.fasta | pigeons         | Urban_bird | T | 99.6  | .   | 100   | 99.9  | 100 | 100 | .    |
| 2016-TE-2288-1-1.fasta  | Chicken food    | Chicken    | I | .     | 100 | 100   | 99.9  | 100 | 100 | 100  |
| 2016-TE-24037-1-1.fasta | pigeons         | Urban_bird | T | 99.6  | .   | 100   | 99.9  | 100 | 100 | .    |
| 2016-TE-24038-1-1.fasta | pigeons         | Urban_bird | T | 99.6  | .   | 100   | 99.9  | 100 | 100 | .    |
| 2016-TE-24471-1-1.fasta | Crow            | Urban_bird | T | 88.62 | .   | 100   | 100   | 100 | 100 | .    |
| 2016-TE-25584-1-1.fasta | Crow            | Urban_bird | T | 88.62 | .   | 100   | 100   | 100 | 100 | .    |
| 2016-TE-25585-1-1.fasta | pigeons         | Urban_bird | T | 99.6  | .   | 100   | 99.9  | 100 | 100 | .    |
| 2016-TE-25586-1-1.fasta | pigeons         | Urban_bird | T | 99.6  | .   | 100   | 99.9  | 100 | 100 | .    |
| 2016-TE-2659-1-1.fasta  | Chicken animals | Chicken    | I | 100   | .   | 100   | 99.9  | 100 | 100 | 100  |
| 2016-TE-2664-1-1.fasta  | Chicken animals | Chicken    | I | 100   | .   | 100   | 99.9  | 100 | 100 | 100  |
| 2016-TE-2665-1-1.fasta  | Chicken animals | Chicken    | I | 100   | .   | 100   | 99.9  | 100 | 100 | 100  |
| 2016-TE-27119-1-1.fasta | pigeons         | Urban_bird | T | 99.6  | .   | 100   | 99.9  | 100 | 100 | .    |
| 2016-TE-27121-1-1.fasta | pigeons         | Urban_bird | T | 99.6  | .   | 100   | 99.9  | 100 | 100 | .    |
| 2016-TE-27123-1-1.fasta | pigeons         | Urban_bird | T | 99.6  | .   | 100   | 99.9  | 100 | 100 | .    |
| 2016-TE-27124-1-1.fasta | pigeons         | Urban_bird | T | 99.6  | .   | 100   | 99.9  | 100 | 100 | .    |
| 2016-TE-27127-1-1.fasta | pigeons         | Urban_bird | T | 99.6  | .   | 100   | 99.9  | 100 | 100 | .    |
| 2016-TE-2793-1-1.fasta  | Chicken food    | Chicken    | I | .     | 100 | 100   | 100   | 100 | 100 | 99.9 |
| 2016-TE-2986-1-1.fasta  | Chicken animals | Chicken    | V | .     | 100 | 100   | 100   | 100 | 100 | 100  |
| 2016-TE-2989-1-1.fasta  | Chicken animals | Chicken    | I | .     | 100 | 100   | 100   | 100 | 100 | .    |



|                         |                 |         |   |     |     |       |       |       |       |      |
|-------------------------|-----------------|---------|---|-----|-----|-------|-------|-------|-------|------|
| 2016-TE-2994-1-1.fasta  | Chicken animals | Chicken | I | .   | 100 | 100   | 100   | 100   | 100   | 99.9 |
| 2016-TE-3000-1-1.fasta  | Chicken food    | Chicken | I | .   | 100 | 100   | 100   | 100   | 100   | 99.9 |
| 2016-TE-30153-1-1.fasta | Chicken food    | Chicken | I | .   | 100 | 100   | 100   | 100   | 100   | 99.9 |
| 2016-TE-30158-1-1.fasta | human           | Human   | T | .   | 100 | 100   | 99.9  | 100   | 100   | .    |
| 2016-TE-30159-1-1.fasta | human           | Human   | T | .   | 100 | 100   | 100   | 100   | 99.84 | 99.9 |
| 2016-TE-30160-1-1.fasta | human           | Human   | I | .   | 100 | 100   | 99.9  | 100   | 100   | 100  |
| 2016-TE-30161-1-1.fasta | human           | Human   | I | .   | .   | 100   | 99.9  | 100   | 100   | 100  |
| 2016-TE-30162-1-1.fasta | human           | Human   | I | .   | 100 | 100   | 100   | 100   | 100   | .    |
| 2016-TE-30164-1-1.fasta | human           | Human   | I | .   | 100 | 99.91 | 99.55 | 99.93 | 100   | .    |
| 2016-TE-30165-1-1.fasta | human           | Human   | I | .   | 100 | 100   | 100   | 100   | 100   | 99.9 |
| 2016-TE-3239-1-1.fasta  | Chicken animals | Chicken | I | .   | 100 | 100   | 100   | 100   | 100   | 99.9 |
| 2016-TE-3240-1-1.fasta  | Chicken animals | Chicken | I | .   | 100 | 100   | 100   | 100   | 100   | .    |
| 2016-TE-3259-1-1.fasta  | Chicken animals | Chicken | I | .   | 100 | 100   | 100   | 100   | 100   | .    |
| 2016-TE-3269-1-1.fasta  | Chicken animals | Chicken | I | .   | 100 | 100   | 100   | 100   | 100   | .    |
| 2016-TE-3270-1-1.fasta  | Chicken animals | Chicken | I | 100 | .   | 100   | 99.9  | 99.93 | 100   | 100  |
| 2016-TE-3567-1-1.fasta  | Chicken food    | Chicken | T | .   | 100 | 100   | 99.9  | 100   | 100   | .    |
| 2016-TE-3568-1-1.fasta  | Chicken food    | Chicken | I | .   | 100 | 100   | 100   | 100   | 100   | 99.9 |
| 2016-TE-3570-1-1.fasta  | Chicken food    | Chicken | I | .   | 100 | 100   | 100   | 100   | 100   | .    |
| 2016-TE-3576-1-1.fasta  | Chicken food    | Chicken | I | .   | 100 | 100   | 100   | 100   | 100   | .    |
| 2016-TE-3577-1-1.fasta  | Chicken food    | Chicken | I | .   | 100 | 100   | 100   | 100   | 100   | .    |
| 2016-TE-3578-1-1.fasta  | Chicken food    | Chicken | I | 100 | .   | 100   | 99.9  | 100   | 100   | 100  |
| 2016-TE-4129-1-1.fasta  | Chicken animals | Chicken | I | .   | 100 | 100   | 100   | 100   | 100   | 99.9 |
| 2016-TE-4135-1-1.fasta  | Chicken animals | Chicken | I | .   | 100 | 100   | 100   | 100   | 100   | 99.9 |
| 2016-TE-4140-1-1.fasta  | Chicken food    | Chicken | I | .   | 100 | 100   | 100   | 100   | 100   | .    |
| 2016-TE-4143-1-1.fasta  | Chicken animals | Chicken | I | .   | 100 | 100   | 100   | 100   | 100   | .    |
| 2016-TE-4144-1-1.fasta  | Chicken animals | Chicken | I | .   | 100 | 99.91 | 99.55 | 99.93 | 100   | 100  |
| 2016-TE-4613-1-1.fasta  | Chicken food    | Chicken | I | .   | 100 | 100   | 100   | 100   | 100   | 99.9 |
| 2016-TE-4698.fasta      | Chicken animals | Chicken | I | 100 | .   | 100   | 100   | 100   | 100   | .    |
| 2016-TE-4700.fasta      | Chicken animals | Chicken | I | 100 | .   | 100   | 100   | 100   | 100   | .    |
| 2016-TE-4702.fasta      | Chicken animals | Chicken | I | 100 | .   | 100   | 100   | 100   | 100   | .    |
| 2016-TE-4703.fasta      | Chicken animals | Chicken | I | 100 | .   | 100   | 100   | 100   | 100   | .    |
| 2016-TE-4704.fasta      | Chicken animals | Chicken | I | 100 | .   | 100   | 100   | 100   | 100   | .    |

|                        |                 |            |   |             |                  |       |       |       |     |                   |
|------------------------|-----------------|------------|---|-------------|------------------|-------|-------|-------|-----|-------------------|
| 2016-TE-4706.fasta     | Chicken animals | Chicken    | I | 100         | .                | 100   | 100   | 100   | 100 | .                 |
| 2016-TE-4754-1-1.fasta | Chicken animals | Chicken    | I | .           | 100              | 100   | 99.9  | 100   | 100 | 100               |
| 2016-TE-4756-1-1.fasta | Chicken animals | Chicken    | I | 100         | .                | 100   | 99.9  | 99.93 | 100 | 100               |
| 2016-TE-4761-1-1.fasta | Chicken animals | Chicken    | I | 100         | .                | 100   | 99.9  | 99.93 | 100 | 100               |
| 2016-TE-4764-1-1.fasta | Chicken animals | Chicken    | I | .           | 100              | 100   | 99.9  | 100   | 100 | 100               |
| 2016-TE-4765-1-1.fasta | Chicken animals | Chicken    | I | 100         | .                | 99.91 | 99.55 | 99.93 | 100 | 39.38;45.99;20.26 |
| 2016-TE-4766-1-1.fasta | Chicken animals | Chicken    | I | 100         | .                | 100   | 99.9  | 100   | 100 | 100               |
| 2016-TE-4771-1-1.fasta | Chicken animals | Chicken    | T | .           | 100              | 99.91 | 99.55 | 100   | 100 | 100               |
| 2016-TE-4777-1-1.fasta | Chicken animals | Chicken    | I | .           | 100              | 100   | 100   | 100   | 100 | 99.9              |
| 2016-TE-4797-1-1.fasta | Chicken animals | Chicken    | I | .           | 100              | 100   | 99.9  | 100   | 100 | 100               |
| 2016-TE-4804-1-1.fasta | Chicken animals | Chicken    | T | .           | 100              | 100   | 100   | 100   | 100 | 99.9              |
| 2016-TE-4806-1-1.fasta | Chicken animals | Chicken    | I | .           | 100              | 100   | 100   | 100   | 100 | 99.9              |
| 2016-TE-4808-1-1.fasta | Chicken animals | Chicken    | I | .           | 100              | 99.91 | 99.55 | 100   | 100 | 100               |
| 2016-TE-4810-1-1.fasta | Chicken animals | Chicken    | T | 100         | .                | 100   | 99.9  | 100   | 100 | 99.9              |
| 2016-TE-4811-1-1.fasta | Chicken animals | Chicken    | T | .           | 100              | 100   | 99.9  | 100   | 100 | .                 |
| 2016-TE-4819-1-1.fasta | Chicken animals | Chicken    | I | 100         | .                | 100   | 99.9  | 100   | 100 | 100               |
| 2016-TE-6009-1-1.fasta | pigeons         | Urban_bird | T | 97.19       | .                | 100   | 100   | 100   | 100 | 23.75             |
| 2016-TE-6010-1-1.fasta | pigeons         | Urban_bird | T | 97.19       | .                | 100   | 100   | 100   | 100 | .                 |
| 2016-TE-6262.fasta     | Chicken animals | Chicken    | I | .           | 7.11;56.33;50.78 | 100   | 100   | 100   | 100 | .                 |
| 2016-TE-6264.fasta     | Chicken animals | Chicken    | T | 100         | 100              | 100   | 100   | 100   | 100 | 100               |
| 2016-TE-6265.fasta     | Chicken animals | Chicken    | I | 16.73;69.21 | 100              | 100   | 100   | 100   | 100 | 15.78;27.92       |
| 2016-TE-6448-1-1.fasta | Chicken animals | Chicken    | T | .           | 100              | 100   | 100   | 100   | 100 | 99.9              |
| 2016-TE-6463-1-1.fasta | Chicken animals | Chicken    | I | .           | 100              | 100   | 100   | 100   | 100 | 99.9              |
| 2016-TE-6832-1-1.fasta | pigeons         | Urban_bird | T | 99.6        | .                | 100   | 99.9  | 100   | 100 | .                 |
| 2016-TE-6834-1-1.fasta | pigeons         | Urban_bird | T | 99.6        | .                | 100   | 99.9  | 100   | 100 | .                 |
| 2016-TE-7428-1-1.fasta | Chicken food    | Chicken    | T | .           | 100              | 100   | 99.9  | 100   | 100 | 100               |
| 2016-TE-7430-1-1.fasta | Chicken food    | Chicken    | I | 100         | .                | 100   | 99.9  | 100   | 100 | 100               |
| 2016-TE-7431-1-1.fasta | Chicken food    | Chicken    | I | 100         | .                | 100   | 99.9  | 100   | 100 | 100               |
| 2016-TE-7432-1-1.fasta | Chicken food    | Chicken    | I | .           | 100              | 100   | 100   | 100   | 100 | .                 |
| 2016-TE-7433-1-1.fasta | Chicken food    | Chicken    | T | .           | 100              | 100   | 100   | 100   | 100 | .                 |
| 2016-TE-7435-1-1.fasta | Chicken food    | Chicken    | I | .           | 100              | 100   | 100   | 100   | 100 | 99.9              |
| 2016-TE-7439-1-1.fasta | Chicken food    | Chicken    | I | .           | 100              | 100   | 99.9  | 100   | 100 | 100               |

|                         |              |            |   |       |     |       |       |              |       |      |
|-------------------------|--------------|------------|---|-------|-----|-------|-------|--------------|-------|------|
| 2016-TE-7440-1-1.fasta  | Chicken food | Chicken    | I | 100   | .   | 100   | 99.9  | 100          | 100   | 100  |
| 2016-TE-7816-1-1.fasta  | Chicken food | Chicken    | I | .     | 100 | 100   | 100   | 100          | 100   | .    |
| 2016-TE-7817-1-1.fasta  | Chicken food | Chicken    | I | 100   | .   | 100   | 99.9  | 100          | 100   | 100  |
| 2016-TE-7822-1-1.fasta  | Chicken food | Chicken    | V | .     | 100 | 100   | 100   | 100          | 100   | 100  |
| 2016-TE-7827-1-1.fasta  | Chicken food | Chicken    | I | 97.19 | .   | 100   | 99.9  | 100          | 100   | 99.9 |
| 2016-TE-8161-1-1.fasta  | Chicken food | Chicken    | I | .     | 100 | 100   | 100   | 100          | 100   | 99.9 |
| 2016-TE-8199-1-1.fasta  | pigeons      | Urban_bird | T | 97.19 | .   | 100   | 100   | 100          | 100   | .    |
| 2016-TE-8476-1-1.fasta  | Chicken food | Chicken    | I | 100   | .   | 100   | 99.9  | 100          | 100   | 100  |
| 2016-TE-8482-1-1.fasta  | Chicken food | Chicken    | T | .     | 100 | 100   | 99.9  | 100          | 100   | .    |
| 2016-TE-8485-1-1.fasta  | Chicken food | Chicken    | V | .     | 100 | 100   | 100   | 100          | 100   | 100  |
| 2016-TE-8487-1-1.fasta  | Chicken food | Chicken    | T | .     | 100 | 100   | 100   | 100          | 100   | .    |
| 2016-TE-8488-1-1.fasta  | Chicken food | Chicken    | T | .     | 100 | 100   | 100   | 100          | 100   | 99.9 |
| 2016-TE-8489-1-1.fasta  | Chicken food | Chicken    | I | 100   | .   | 99.91 | 99.55 | 99.93        | 100   | 100  |
| 2016-TE-8490-1-1.fasta  | Chicken food | Chicken    | V | .     | 100 | 100   | 100   | 100          | 100   | 100  |
| 2016-TE-8491-1-1.fasta  | Chicken food | Chicken    | I | 100   | .   | 100   | 99.9  | 100          | 100   | 99.9 |
| 2016-TE-8593-1-1.fasta  | Chicken food | Chicken    | I | .     | 100 | 100   | 100   | 100          | 100   | 99.9 |
| 2016-TE-8597-1-1.fasta  | pigeons      | Urban_bird | T | 99.6  | .   | 100   | 99.9  | 100          | 100   | .    |
| 2016-TE-895.fasta       | human        | Human      | I | .     | .   | 100   | 100   | 100          | 100   | 100  |
| 2016-TE-8991-1-1.fasta  | Chicken food | Chicken    | I | .     | 100 | 100   | 100   | 100          | 100   | 99.9 |
| 2016-TE-8993-1-1.fasta  | Chicken food | Chicken    | I | .     | 100 | 100   | 100   | 100          | 100   | 99.9 |
| 2017.TE.27617.1.1.fasta | pigeons      | Urban_bird | I | .     | 100 | 100   | 100   | 100          | 100   | 99.9 |
| 2017.TE.27619.1.1.fasta | pigeons      | Urban_bird | I | 98.13 | .   | 100   | 99.9  | 100          | 100   | .    |
| 2017.TE-27620.1.1.fasta | pigeons      | Urban_bird | T | 99.6  | .   | 100   | 99.9  | 24.48;100.00 | 100   | .    |
| 2017-TE-12276-1-1.fasta | pigeons      | Urban_bird | T | 88.62 | .   | 100   | 100   | 100          | 100   | 100  |
| 2017-TE-12278-1-1.fasta | magpie       | Urban_bird | T | .     | 100 | 100   | 99.9  | 100          | 99.84 | .    |
| 2017-TE-12279-1-1.fasta | pigeons      | Urban_bird | T | 99.6  | .   | 100   | 99.9  | 100          | 100   | .    |
| 2017-TE-13762.fasta     | human        | Human      | T | .     | .   | 100   | 100   | 100          | 100   | .    |
| 2017-TE-13763.fasta     | human        | Human      | I | .     | 100 | 100   | 100   | 100          | 100   | 100  |
| 2017-TE-13764.fasta     | human        | Human      | I | 97.32 | .   | 100   | 99.9  | 100          | 100   | .    |
| 2017-TE-13765.fasta     | human        | Human      | I | .     | 100 | 100   | 100   | 100          | 100   | .    |
| 2017-TE-13766.fasta     | human        | Human      | I | .     | 100 | 100   | 100   | 100          | 100   | 99.9 |
| 2017-TE-13767.fasta     | human        | Human      | I | .     | 100 | 100   | 100   | 100          | 100   | .    |

|                         |          |            |   |      |     |       |       |       |       |                        |
|-------------------------|----------|------------|---|------|-----|-------|-------|-------|-------|------------------------|
| 2017-TE-13768.fasta     | human    | Human      | I | 100  | .   | 100   | 99.9  | 100   | 100   | 100                    |
| 2017-TE-13769.fasta     | human    | Human      | I | 100  | .   | 100   | 99.9  | 100   | 100   | 100                    |
| 2017-TE-13771.fasta     | human    | Human      | I | .    | 100 | 100   | 100   | 100   | 100   | 45.99;39.38;22.66      |
| 2017-TE-13772.fasta     | human    | Human      | I | .    | 100 | 100   | 100   | 100   | 100   | 45.99;39.38;22.66      |
| 2017-TE-13775.fasta     | human    | Human      | I | 100  | .   | 100   | 99.9  | 100   | 100   | 100                    |
| 2017-TE-13781.fasta     | human    | Human      | T | .    | 100 | 100   | 100   | 100   | 100   | .                      |
| 2017-TE-13782.fasta     | human    | Human      | T | .    | 100 | 100   | 100   | 100   | 98.42 | .                      |
| 2017-TE-13783.fasta     | human    | Human      | I | .    | 100 | 100   | 99.9  | 100   | 100   | 99.9                   |
| 2017-TE-13784.fasta     | human    | Human      | T | .    | 100 | 100   | 100   | 100   | 100   | .                      |
| 2017-TE-13785.fasta     | human    | Human      | I | .    | 100 | 100   | 100   | 100   | 100   | 100                    |
| 2017-TE-13787.fasta     | human    | Human      | T | .    | 100 | 100   | 100   | 100   | 99.84 | 99.9                   |
| 2017-TE-13788.fasta     | human    | Human      | I | .    | 100 | 100   | 100   | 100   | 100   | .                      |
| 2017-TE-13789.fasta     | human    | Human      | I | .    | 100 | 100   | 99.9  | 100   | 100   | 100                    |
| 2017-TE-13790.fasta     | human    | Human      | I | .    | 100 | 100   | 100   | 100   | 100   | 9.06;45.99;39.38;22.55 |
| 2017-TE-13791.fasta     | human    | Human      | I | .    | 100 | 100   | 99.9  | 100   | 100   | 99.9                   |
| 2017-TE-13793.fasta     | human    | Human      | T | .    | 100 | 99.91 | 99.55 | 100   | 100   | 100                    |
| 2017-TE-13795.fasta     | human    | Human      | I | .    | 100 | 100   | 99.9  | 100   | 100   | 99.9                   |
| 2017-TE-13796.fasta     | human    | Human      | I | .    | 100 | 100   | 99.9  | 100   | 100   | 99.9                   |
| 2017-TE-13797.fasta     | human    | Human      | I | .    | 100 | 100   | 100   | 100   | 100   | 99.9                   |
| 2017-TE-13798.fasta     | human    | Human      | I | .    | 100 | 100   | 100   | 100   | 100   | .                      |
| 2017-TE-16477-1-1.fasta | pheasant | Urban_bird | T | .    | 100 | 100   | 100   | 99.93 | 97    | 99.9                   |
| 2017-TE-16478-1-1.fasta | pigeons  | Urban_bird | T | 99.6 | .   | 100   | 99.9  | 100   | 100   | .                      |
| 2017-TE-16479-1-1.fasta | pigeons  | Urban_bird | T | 99.6 | .   | 100   | 99.9  | 100   | 100   | .                      |
| 2017-TE-16480-1-1.fasta | pigeons  | Urban_bird | T | 99.6 | .   | 100   | 99.9  | 100   | 100   | .                      |
| 2017-TE-16481-1-1.fasta | pigeons  | Urban_bird | T | 99.6 | .   | 100   | 99.9  | 100   | 100   | .                      |
| 2017-TE-17866-1-1.fasta | mallard  | Wild_bird  | T | 100  | .   | 100   | 100   | 100   | 100   | .                      |
| 2017-TE-17868-1-1.fasta | mallard  | Wild_bird  | T | 100  | .   | 100   | 99.9  | 100   | 100   | .                      |
| 2017-TE-19477-1-1.fasta | pigeons  | Urban_bird | T | 99.6 | .   | 100   | 99.9  | 100   | 100   | .                      |
| 2017-TE-19479-1-1.fasta | pigeons  | Urban_bird | T | 99.6 | .   | 100   | 99.9  | 100   | 100   | .                      |
| 2017-TE-19481-1-1.fasta | pigeons  | Urban_bird | T | 99.6 | .   | 100   | 99.9  | 100   | 100   | .                      |
| 2017-TE-19486-1-1.fasta | pigeons  | Urban_bird | T | 99.6 | .   | 100   | 99.9  | 100   | 100   | .                      |
| 2017-TE-19487-1-1.fasta | pigeons  | Urban_bird | T | 99.6 | .   | 100   | 99.9  | 100   | 100   | .                      |

|                        |         |            |   |      |   |     |      |     |     |      |
|------------------------|---------|------------|---|------|---|-----|------|-----|-----|------|
| 2017-TE-3069-1-1.fasta | pigeons | Urban_bird | T | 99.6 | . | 100 | 99.9 | 100 | 100 | .    |
| 2017-TE-4824-1-1.fasta | pigeons | Urban_bird | T | 99.6 | . | 100 | 100  | 100 | 100 | .    |
| 2017-TE-6838-1-1.fasta | pigeons | Urban_bird | T | .    | . | 100 | 99.9 | 100 | 100 | 99.9 |
| 2017-TE-6840-1-1.fasta | pigeons | Urban_bird | T | 99.6 | . | 100 | 99.9 | 100 | 100 | .    |
| 2017-TE-6841-1-1.fasta | pigeons | Urban_bird | T | 99.6 | . | 100 | 99.9 | 100 | 100 | .    |
